# Supplementary material
Source: Springer Nature journal article supplement (https://www.springermedizin.de/resource/supplementary/13075_2013_4021_MOESM1_ESM.pdf/9695886)
Supplement: MOESM1 [file 9695886]

## Supplementary Figure S1.

| Kinase Target                | %Competition |
|------------------------------|--------------|
| SYK                          | 99           |
| JAK1(JH2domain-pseudokinase) | 97           |
| JAK3(JH1domain-catalytic)    | 97           |
| GCN2(Kin.Dom.2,S808G)        | 95           |
| SLK                          | 93           |
| FLT3(ITD)                    | 92           |
| PAK7                         | 92           |

Figure S1. Listed kinases with more than 90% binding efficiency with RO9021 (1  $\mu$ M) in KinomeScan Assay.

## Supplementary Figure S2.

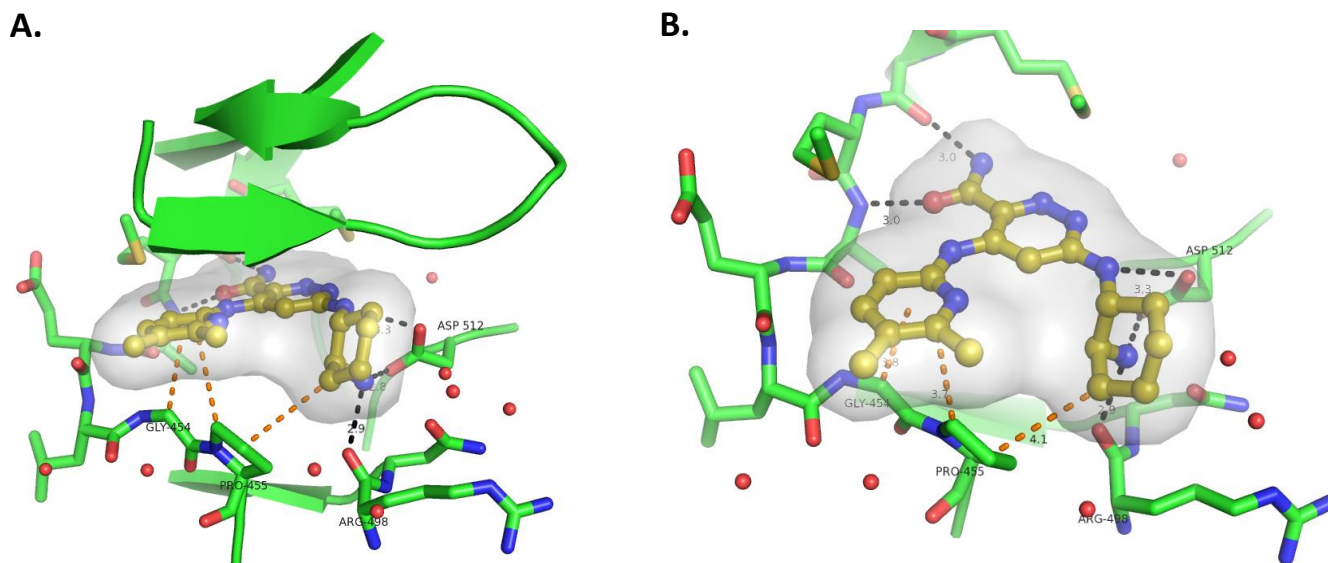

Supplemental Fig. S2. The X-ray crystal structure of SYK with front view (A.) and top view (B.), showing the ATP binding site with RO9021 bound. Black dashes represent hydrogen bonds, and orange dashes show hydrophobic contacts to the Gly454/Pro455 region.

## Supplementary Figure S3.

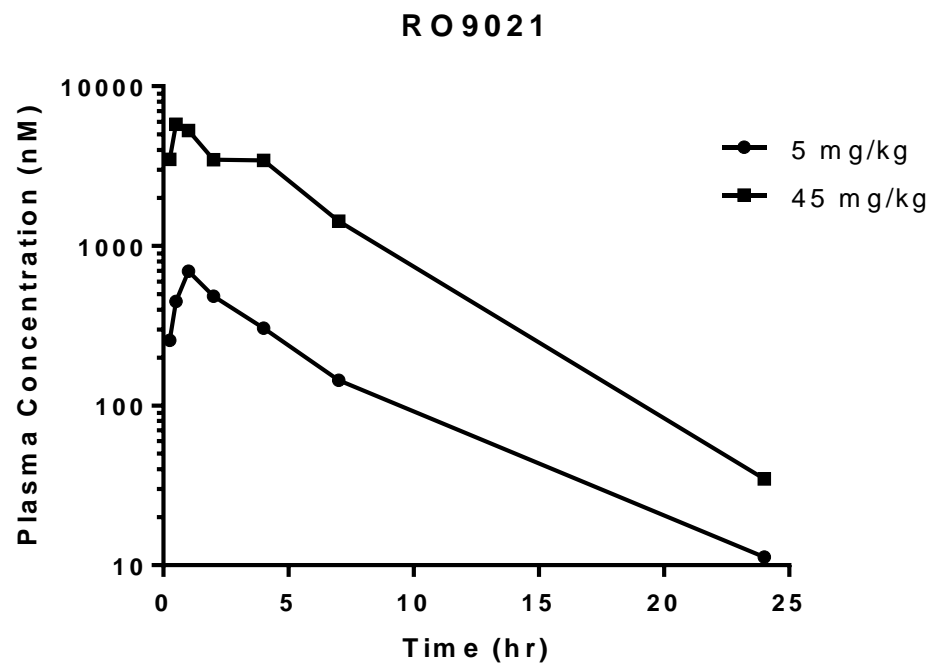

Supplemental Fig. S3. Pharmacokinetics (PK) profile of single oral dose of RO9021 in mouse.
